# Supplementary material
Source: Springer Nature journal article supplement (https://www.springermedizin.de/resource/supplementary/12961_2012_265_MOESM1_ESM.pdf/9571000)
Supplement: MOESM1 [file 9571000]

### **Step 1: Research scoping**

- 1a:** Research impact literature scan
  - 1b:** Initial document analysis for each project
  - 1c:** Develop study methods and measures
  - 1d:** Determine sample frame
  - 1e:** Pilot testing of interview guides
- 

### **Step 2: Data collection**

- 2a:** Semi-structured telephone interviews with Chief investigators (n=17)
  - 2b:** Semi-structured telephone interviews with end users (n=29)
  - 2c:** Document verification & bibliometric analysis
- 

### **Step 3: Impact assessment**

- 3a:** Case summaries developed (Triangulation of data)
- 3b:** Independent assessment research impact (across domains)
- 3c:** Verification panel determination of group assessments of impact
- 3d:** Identify mediators of impact
